# Supplementary material for: Diversity of lanternfish (Myctophidae) larvae along the Ninety East Ridge, Indian Ocean
Source: PeerJ. 2025 Mar 17;13:e19144. doi: 10.7717/peerj.19144 (PMC11925047; doi:10.7717/peerj.19144)
Supplement: Supplemental Information 1 [file peerj-13-19144-s001.xlsx]

## Sheet: Sheet1
Supplementary Table. 1. NCBI GenBank accession numbers obtained in this study
Genus	Species	Sample ID	GenBank Accession number
Benthosema	Benthosema suborbitale	F83	OQ646873
		F96	OQ646874
		F111	OQ646875
		F113	OQ646872
		F528	OQ646871
Bolinichthys	Bolinichthys distofax	F55	OQ658664
		F59	OQ658663
		F74	OQ658662
		F219	OQ658661
		F355	OQ658665
		F418	OQ658666
	Bolinichthys photothorax	F9	OQ658660
		F11	OQ658659
		F13	OQ658658
		F17	OQ658657
		F23	OQ658656
		F26	OQ658655
		F176	OQ658654
		F215	OQ658653
	Bolinichthys sp.1	F42	OQ658670
		F53	OQ658671
		F339	OQ658667
		F373	OQ658668
		F379	OQ658669
Ceratoscopelus	Ceratoscopelus warmingii	F6	OQ651078
		F18	OQ651079
		F31	OQ651080
		F39	OQ651081
		F50	OQ651082
		F56	OQ651083
		F72	OQ651084
		F79	OQ651085
		F84	OQ651086
		F86	OQ651087
		F152	OQ651088
		F169	OQ651089
		F231	OQ651066
		F254	OQ651090
		F297	OQ651091
		F316	OQ651092
		F318	OQ651093
		F351	OQ651094
		F368	OQ651074
		F387	OQ651075
		F392	OQ651076
		F397	OQ651077
		F412	OQ651065
		F439	OQ651064
		F443	OQ651073
		F460	OQ651072
		F479	OQ651071
		F497	OQ651070
		F504	OQ651069
		F509	OQ651068
		F515	OQ651067
Dasyscopelus	Dasyscopelus sp.	F133	OQ672524
Diaphus	Diaphus splendidus	F100	OQ651153
		F128	OQ651160
		F167	OQ651159
		F221	OQ651158
		F263	OQ651157
		F267	OQ651156
		F334	OQ651155
		F539	OQ651154
	Diaphus brachycephalus	F2	OQ647976
		F8	OQ647975
		F25	OQ647974
		F58	OQ647973
		F94	OQ647972
		F102	OQ647971
		F108	OQ647970
		F110	OQ647969
		F177	OQ647968
		F236	OQ647977
		F249	OQ647967
		F252	OQ647966
		F258	OQ647965
		F259	OQ647964
		F268	OQ647963
		F270	OQ647962
		F363	OQ647961
		F381	OQ647960
		F390	OQ647959
		F393	OQ647958
		F402	OQ647978
		F411	OQ647979
		F419	OQ647980
		F423	OQ647981
		F436	OQ647957
		F441	OQ647982
		F445	OQ647983
		F452	OQ647984
		F536	OQ647985
	Diaphus effulgens	F224	OQ652133
		F226	OQ652132
		F519	OQ652134
	Diaphus fragilis	F106	OQ651188
		F107	OQ651189
		F134	OQ651187
		F148	OQ651186
		F288	OQ651190
		F304	OQ651191
		F314	OQ651192
		F317	OQ651193
		F324	OQ651194
		F333	OQ651195
		F400	OQ651196
		F468	OQ651185
	Diaphus sp.1	F153	OQ658652
	Diaphus sp.2	F160	OQ658651
	Diaphus sp.3	F49	OQ658646
		F60	OQ658645
		F81	OQ658644
		F116	OQ658643
		F149	OQ658648
		F495	OQ658649
		F511	OQ658650
		F544	OQ658647
	Diaphus sp.4	F142	OQ658641
		F157	OQ658642
	Diaphus lucidus	F150	OQ652131
	Diaphus mollis	F29	OQ652129
		F165	OQ652121
		F367	OQ652130
		F420	OQ652122
		F446	OQ652123
		F448	OQ652124
		F480	OQ652125
		F491	OQ652126
		F507	OQ652127
		F520	OQ652128
	Diaphus parri	F162	OQ652119
		F391	OQ652120
	Diaphus richardsoni	F121	OQ651109
		F170	OQ651110
		F250	OQ651111
		F340	OQ651112
		F352	OQ651100
		F365	OQ651102
		F383	OQ651103
		F386	OQ651104
		F388	OQ651105
		F389	OQ651106
		F394	OQ651107
		F399	OQ651099
		F401	OQ651098
		F409	OQ651097
		F417	OQ651096
		F426	OQ651095
		F442	OQ651101
		F522	OQ651108
	Diaphus termophilus	F95	OQ652135
	Diaphus perspicillatus	F82	OQ651184
		F166	OQ651174
		F212	OQ651177
		F225	OQ651178
		F233	OQ651179
		F237	OQ651180
		F238	OQ651181
		F328	OQ651182
		F362	OQ651183
		F438	OQ651176
		F455	OQ651175
	Diaphus phillipsi	F242	OQ652117
		F298	OQ652118
Hygophum	Hygophum sp.	F537	OQ648151
Myctophidae incertae sedis	Myctophidae incertae sedis	F63	OQ648162
		F138	OQ648161
		F139	OQ648160
		F154	OQ648159
		F485	OQ648158
Lampadena	Lampadena sp.1	F67	OQ658677
		F73	OQ658676
		F535	OQ658675
	Lampadena sp.2	F347	OQ658674
	Lampadena luminosa	F22	OQ651992
		F65	OQ651989
		F70	OQ651990
		F99	OQ651991
		F407	OQ651988
		F474	OQ651987
Lampanyctus	Lampanyctus sp.1	F147	OQ658692
		F322	OQ658693
	Lampanyctus sp.2	F41	OQ658703
		F510	OQ658704
	Lampanyctus sp.3	F64	OQ658701
		F159	OQ658698
		F299	OQ658694
		F306	OQ658697
		F307	OQ658702
		F338	OQ658696
		F395	OQ658695
		F524	OQ658699
		F525	OQ658700
	Lampanyctus sp.4	F52	OQ658710
		F137	OQ658711
		F145	OQ658712
		F151	OQ658713
		F173	OQ658709
		F295	OQ658708
		F305	OQ658714
		F341	OQ658707
		F356	OQ658706
		F538	OQ658715
		F530	OQ658716
	Lampanyctus nobilis	F360	OQ651124
		F37	OQ651126
		F117	OQ651127
		F144	OQ651119
		F228	OQ651120
		F247	OQ651121
		F248	OQ651122
		F327	OQ651123
		F380	OQ651125
		F434	OQ651118
		F437	OQ651117
		F440	OQ651116
		F447	OQ651115
		F475	OQ651114
		F521	OQ651113
	Lampanyctus tenuiformis	F403	OQ658705
Notolychnus	Notolychnus valdiviae	F76	OQ645695
		F109	OQ645687
		F119	OQ645688
		F155	OQ645686
		F185	OQ645689
		F205	OQ645690
		F207	OQ645691
		F271	OQ645692
		F361	OQ645693
		F369	OQ645694
		F462	OQ645685
		F469	OQ645684
		F541	OQ645683
Symbolophorus	Symbolophorus evermanni	F463	OQ672525
	Symbolophorus rufinus	F171	OQ651197
		F337	OQ651198
		F366	OQ651199
		F430	OQ651201
		F501	OQ651200
	Symbolophorus sp.1	F88	OQ658634
		F156	OQ658633
		F325	OQ658627
		F494	OQ658632
		F498	OQ658631
		F499	OQ658630
		F529	OQ658629
		F542	OQ658628
	Symbolophorus sp.2	F78	OQ658637
		F112	OQ658638
		F191	OQ658639
		F335	OQ658640
		F413	OQ658636
		F421	OQ658635
Triphoturus	Triphoturus nigrescens	F85	OQ647905
		F90	OQ647906
		F140	OQ647904
		F345	OQ647907
		F527	OQ647903
		F533	OQ647902
