# Supplementary material for: Diversity of lanternfish (Myctophidae) larvae along the Ninety East Ridge, Indian Ocean
Source: PeerJ. 2025 Mar 17;13:e19144. doi: 10.7717/peerj.19144 (PMC11925047; doi:10.7717/peerj.19144)
Supplement: Supplemental Information 2 [file peerj-13-19144-s002.xlsx]

## Sheet: Sheet1
Supplementary Table. 2. Pairwise intraspecific and interspecific genetic distances of lanternfish samples
	Benthosema suborbitale	Bolinichthys distofax	Bolinichthys photothorax	Bolinichthys sp.1	Ceratoscopelus warmingii	Dasyscopelus sp.	Diaphus brachycephalus	Diaphus effulgens	Diaphus fragilis	Diaphus lucidus	Diaphus mollis	Diaphus parri	Diaphus perspicillatus	Diaphus phillipsi	Diaphus richardsoni	Diaphus sp.1	Diaphus sp.2	Diaphus sp.3	Diaphus sp.4	Diaphus splendidus	Diaphus termophilus	Hygophum sp.	Lampadena luminosa	Lampadena sp.1	Lampadena sp.2	Lampanyctus nobilis	Lampanyctus sp.1	Lampanyctus sp.2	Lampanyctus sp.3	Lampanyctus sp.4	Lampanyctus tenuiformis	Myctophidae Incertae sedis	Notolychnus valdiviae	Symbolophorus evermanni	Symbolophorus rufinus	Symbolophorus sp.1	Symbolophorus sp.2	Triphoturus nigrescens	Genetic distance within species
Benthosema suborbitale																																							0.000617284
Bolinichthys distofax	0.235261																																						0.000514404
Bolinichthys photothorax	0.243687	0.106262																																					0.00611127
Bolinichthys sp.1	0.247355	0.0964021	0.0874966																																				0.00434094
Ceratoscopelus warmingii	0.238891	0.14198	0.155438	0.142239																																			0.0119647
Dasyscopelus sp.	0.216417	0.214679	0.23687	0.228251	0.221644																																		n/c
Diaphus brachycephalus	0.215763	0.20846	0.212766	0.200614	0.185882	0.217683																																	0.0034978
Diaphus effulgens	0.214648	0.204915	0.189443	0.187342	0.184712	0.224224	0.13979																																0
Diaphus fragilis	0.204317	0.201159	0.198097	0.186406	0.17809	0.211985	0.122831	0.0753968																															0.000257202
Diaphus lucidus	0.20695	0.217394	0.214868	0.204606	0.205261	0.225342	0.15188	0.0823695	0.0826345																														n/c
Diaphus mollis	0.201106	0.213811	0.206266	0.2099	0.188457	0.234143	0.0937214	0.125839	0.0951188	0.132304																													0.000927095
Diaphus parri	0.211845	0.20905	0.211927	0.195478	0.192393	0.231749	0.106261	0.127013	0.110578	0.133482	0.0782881																												0
Diaphus perspicillatus	0.21286	0.210087	0.200759	0.205556	0.18679	0.217642	0.126039	0.0975795	0.0929476	0.103707	0.116373	0.11505																											0.00297902
Diaphus phillipsi	0.206307	0.206716	0.196007	0.196262	0.180746	0.215785	0.140269	0.0548697	0.0789482	0.0823695	0.12808	0.127261	0.0998585																										0
Diaphus richardsoni	0.221804	0.199719	0.20416	0.185034	0.175619	0.218448	0.0420234	0.13405	0.110199	0.139334	0.0982804	0.104384	0.121286	0.134351																									0.00424176
Diaphus sp.1	0.19519	0.188	0.210488	0.196394	0.192008	0.219401	0.0880218	0.129599	0.112879	0.126181	0.096518	0.111226	0.121864	0.117886	0.0956109																								n/c
Diaphus sp.2	0.199097	0.195528	0.196485	0.183079	0.174703	0.211036	0.138075	0.103429	0.111204	0.122335	0.133799	0.129181	0.134231	0.10159	0.124578	0.141012																							n/c
Diaphus sp.3	0.213609	0.206531	0.195203	0.189849	0.186167	0.233325	0.125843	0.0549571	0.0639259	0.0841371	0.114894	0.110506	0.0948786	0.0759881	0.116759	0.121108	0.117522																						0.0029832
Diaphus sp.4	0.198656	0.195862	0.204475	0.190035	0.189821	0.226856	0.0884144	0.138675	0.120748	0.134538	0.0944431	0.103706	0.139291	0.132844	0.087471	0.0549749	0.132838	0.132832																					0.0077442
Diaphus splendidus	0.186322	0.196882	0.196304	0.18949	0.191897	0.224181	0.142766	0.0988698	0.092369	0.111893	0.123073	0.149924	0.126371	0.110878	0.136893	0.137325	0.129835	0.111241	0.154553																				0.00728366
Diaphus termophilus	0.216857	0.185925	0.188672	0.172179	0.174362	0.226456	0.138159	0.0837175	0.0787093	0.105384	0.118004	0.112602	0.117096	0.101803	0.133727	0.123829	0.116239	0.0740416	0.134084	0.116959																			n/c
Hygophum sp.	0.200206	0.24262	0.257088	0.229752	0.221152	0.204096	0.213646	0.190232	0.200983	0.212219	0.232534	0.211408	0.20727	0.192328	0.21742	0.198343	0.180442	0.210243	0.199485	0.19772	0.197634																		n/c
Lampadena luminosa	0.190131	0.189051	0.215276	0.207438	0.170768	0.2089	0.175748	0.181666	0.172529	0.1915	0.176274	0.166356	0.191719	0.169597	0.175817	0.186553	0.160137	0.174495	0.183672	0.175649	0.16409	0.207461	A																0.00309584
Lampadena sp.1	0.187336	0.179072	0.203651	0.198497	0.162922	0.201695	0.168825	0.176417	0.167324	0.190012	0.172356	0.164612	0.18635	0.164457	0.1657	0.180228	0.15443	0.173753	0.177045	0.170608	0.162742	0.201646	0.0188394																0.0020608
Lampadena sp.2	0.194012	0.185661	0.198859	0.182472	0.166955	0.204915	0.187719	0.187196	0.177996	0.197205	0.1831	0.17901	0.199377	0.17504	0.179184	0.195303	0.163108	0.186635	0.183321	0.160383	0.173312	0.212886	0.0647423	0.0673546															n/c
Lampanyctus nobilis	0.21039	0.171694	0.199865	0.186657	0.162581	0.21057	0.178172	0.193682	0.172569	0.176944	0.197488	0.186537	0.183485	0.175579	0.175461	0.192137	0.176935	0.178883	0.195059	0.206197	0.169457	0.213434	0.174017	0.168484	0.178752														0.00417681
Lampanyctus sp.1	0.213332	0.204919	0.209186	0.219776	0.187568	0.217992	0.183442	0.19039	0.173582	0.195836	0.162078	0.163568	0.175793	0.17824	0.174718	0.175926	0.17187	0.189933	0.192101	0.186749	0.192491	0.221419	0.16754	0.162486	0.17575	0.14191													0.00620163
Lampanyctus sp.2	0.204588	0.198321	0.197903	0.18458	0.192678	0.2211	0.192848	0.206895	0.176498	0.191436	0.176628	0.188951	0.196258	0.182212	0.182404	0.174286	0.193381	0.192654	0.186444	0.193234	0.174286	0.208987	0.16875	0.165035	0.173547	0.116424	0.138599												0.0030912
Lampanyctus sp.3	0.214534	0.193472	0.208283	0.193093	0.182033	0.209016	0.184739	0.211019	0.177597	0.183753	0.170984	0.17763	0.199497	0.192238	0.180095	0.184121	0.195701	0.191716	0.189564	0.191769	0.170078	0.218883	0.175956	0.170659	0.193338	0.109364	0.147131	0.0673882											0.00274711
Lampanyctus sp.4	0.227386	0.195551	0.218156	0.212344	0.166201	0.215967	0.201745	0.191284	0.177169	0.199444	0.175496	0.175568	0.177222	0.189927	0.179797	0.184496	0.171679	0.179016	0.192719	0.204986	0.171291	0.21976	0.172084	0.168056	0.167152	0.0851346	0.134087	0.12425	0.123736										0.0036652
Lampanyctus tenuiformis	0.2186	0.207255	0.209652	0.207975	0.20238	0.227125	0.19912	0.195493	0.172995	0.17853	0.182626	0.188	0.178894	0.172824	0.188546	0.192995	0.184592	0.197368	0.205007	0.185145	0.190881	0.221604	0.187378	0.182481	0.189124	0.129685	0.0635476	0.135815	0.141242	0.152525									n/c
Myctophidae Incertae sedis	0.184979	0.21245	0.239767	0.24174	0.234818	0.197402	0.208127	0.212262	0.206301	0.219671	0.213632	0.206429	0.216426	0.207449	0.203219	0.188561	0.1954	0.211897	0.197444	0.204248	0.218926	0.216066	0.21254	0.201379	0.217626	0.217345	0.202692	0.231059	0.229871	0.232794	0.212196								0.00123528
Notolychnus valdiviae	0.188509	0.242459	0.253459	0.244039	0.233771	0.219995	0.228665	0.191762	0.187656	0.198292	0.194848	0.184498	0.193148	0.189297	0.215869	0.193836	0.187014	0.193619	0.197589	0.198677	0.190614	0.187912	0.179446	0.17803	0.184185	0.222846	0.2052	0.200701	0.214812	0.206896	0.222713	0.205456							0.0299164
Symbolophorus evermanni	0.199449	0.230881	0.239638	0.219378	0.214994	0.218411	0.22383	0.234178	0.210456	0.210679	0.207071	0.222641	0.209443	0.203505	0.215122	0.226896	0.191424	0.217016	0.217888	0.199964	0.209619	0.188144	0.210816	0.203184	0.203505	0.222395	0.234349	0.22336	0.224949	0.217654	0.217028	0.230544	0.20614						n/c
Symbolophorus rufinus	0.202108	0.225618	0.235194	0.218019	0.219418	0.21058	0.23438	0.239108	0.220479	0.218482	0.215047	0.221952	0.208243	0.216834	0.225272	0.234828	0.200128	0.217618	0.232425	0.195758	0.22219	0.1928	0.220463	0.212564	0.209307	0.217042	0.225515	0.219863	0.225896	0.22546	0.204079	0.237536	0.204113	0.02425					0.0012449
Symbolophorus sp.1	0.192571	0.23162	0.251033	0.230642	0.216728	0.211521	0.194014	0.189687	0.190257	0.201074	0.180416	0.180473	0.199615	0.194359	0.20156	0.190421	0.175053	0.190229	0.210632	0.184125	0.193559	0.178379	0.200835	0.198675	0.204327	0.229153	0.205689	0.2305	0.239261	0.209839	0.211472	0.204887	0.202553	0.103391	0.107604				0.000388199
Symbolophorus sp.2	0.210585	0.234012	0.231617	0.20173	0.210259	0.206192	0.191619	0.19548	0.201322	0.215543	0.19967	0.198142	0.199589	0.19548	0.194245	0.21022	0.173214	0.207081	0.206121	0.210367	0.206188	0.185863	0.217645	0.200099	0.204028	0.219724	0.214152	0.215024	0.216945	0.235353	0.195694	0.224875	0.219824	0.118148	0.121407	0.116865			0.00237388
Triphoturus nigrescens	0.19942	0.215265	0.209612	0.210501	0.206718	0.242369	0.182205	0.206144	0.20024	0.212866	0.165748	0.166217	0.193531	0.213072	0.176488	0.182114	0.1898	0.198145	0.183953	0.184536	0.18385	0.227465	0.187144	0.189123	0.179177	0.166812	0.170765	0.188281	0.17191	0.190843	0.173984	0.225173	0.227447	0.228753	0.21868	0.225107	0.223796		0.00195613
